# Supplementary material
Source: Springer Nature journal article supplement (https://www.springermedizin.de/resource/supplementary/12885_2013_4232_MOESM6_ESM.pdf/9465826)

(A) *KvDMR1* (HB08)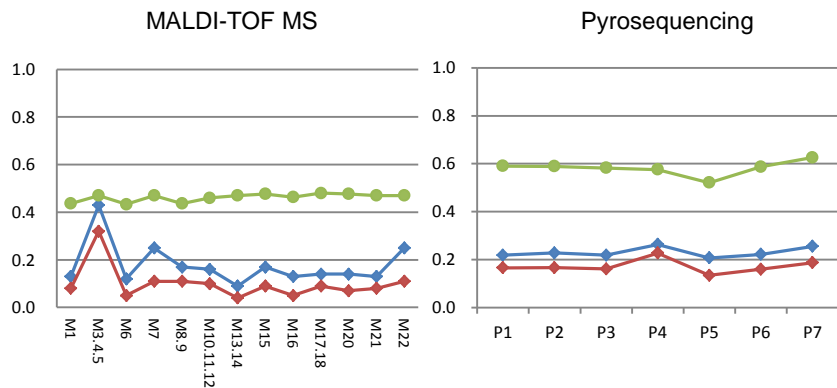(C) *INPP5Fv2* (HB05)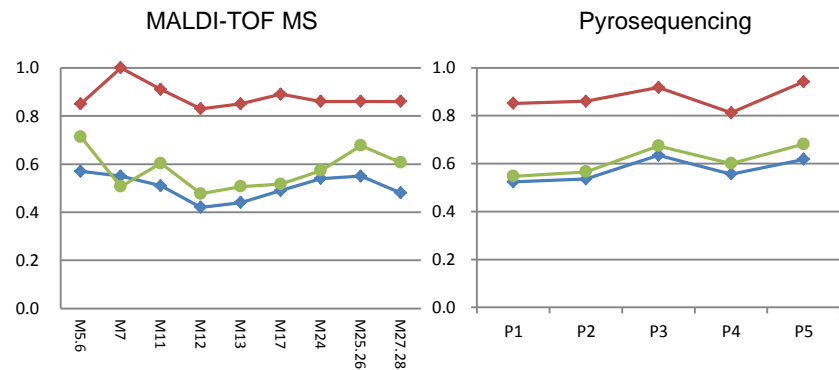(B) *PEG10* (HB11)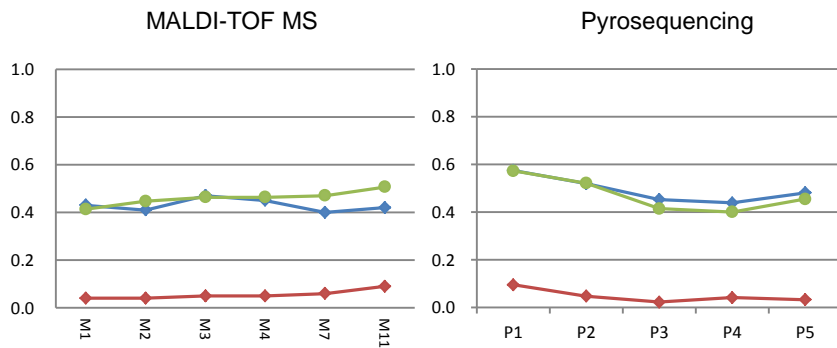(D) *RB1* (HB11)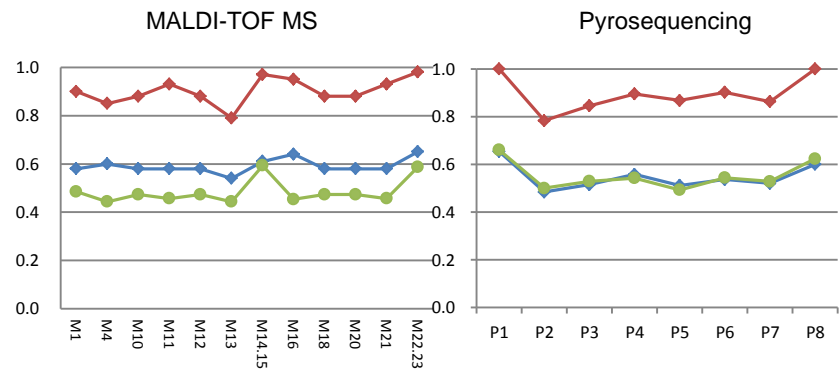

Supplement: MOESM6 [file 9465826]
